# Supplementary material
Source: publisher site journal article supplement (https://www.dovepress.com/article/399371)
Supplement: Supplementary file 1 [file get_supplementary_file.php]

**Supplementary Materials**

**Table S1. Point Scoring System for the Pneumonia Severity Index**

| **Characteristics** | **Points** |
| --- | --- |
| Demographic factor |  |
| Age |  |
| Men | Age (year) |
| Women | Age (year)-10 |
| Nursing home resident | +10 |
| Coexisting illnesses |  |
| Neoplastic disease | +30 |
| Liver disease | +20 |
| Congestive heart failure | +10 |
| Cerebrovascular disease | +10 |
| Renal disease | +10 |
| Physical-examination findings |  |
| Altered mental status | +20 |
| Respiratory rate ≥30/min | +20 |
| Systolic blood pressure <90mmHg | +20 |
| Temperature <35℃ or ≥40℃ | +15 |
| Pulse ≥125/min | +10 |
| Laboratory and radiographic findings |  |
| Arterial pH <7.35 | +30 |
| Blood urea nitrogen ≥11mmol/L | +20 |
| Sodium <130mmol/L | +20 |
| Glucose ≥14mmol/L | +10 |
| Hematocrit <30% | +10 |
| Partial pressure of arterial oxygen <60mmHg | +10 |
| Pleural effusion | +10 |
| Total Points |  |

**Table S2. Characteristics of Patients Divided by the SII.**

|  | **Low** | **Median** | **High** | ***P* for trend** |
| --- | --- | --- | --- | --- |
| **Characteristics** | (n = 153) | (n = 305) | (n = 153) |
| Age, years | 66 (60-72) | 65 (57-73) | 65 (58-75) | 0.597 |
| Male, n (%) | 101 (66.0) | 206 (67.5) | 121 (79.1) | 0.013 |
| BMI, kg/m2 | 24.4 (22.0-26.0) | 24.5 (22.2-26.7) | 24.7 (22.0-26.9) | 0.475 |
| Hypertension, n (%) | 97 (63.4) | 218 (71.5) | 121 (79.1) | 0.002 |
| Diabetes mellitus, n (%) | 28 (18.3) | 56 (18.4) | 23 (15.0) | 0.452 |
| Dyslipidemia, n (%) | 17 (11.1) | 51 (16.7) | 36 (23.5) | 0.004 |
| Atrial fibrillation, n (%) | 24 (15.7) | 68 (22.3) | 35 (22.9) | 0.121 |
| History of cancer, n (%) | 6 (3.9) | 17 (5.6) | 5 (3.3) | 0.785 |
| Drinking status, n (%) |  |  |  | 0.392 |
| Nondrinkers | 99 (64.7) | 192 (63.0) | 88 (57.5) |  |
| Former drinkers | 23 (15.0) | 45 (14.8) | 30 (19.6) |  |
| Current drinkers | 31 (20.3) | 68 (22.3) | 35 (22.9) |  |
| Smoking status, n (%) |  |  |  | 0.863 |
| Nonsmokers | 69 (45.1) | 142 (46.6) | 71 (46.4) |  |
| Former smokers | 14 (9.2) | 23 (7.5) | 16 (10.5) |  |
| Current smokers | 70 (45.8) | 140 (45.9) | 66 (43.1) |  |
| Baseline NIHSS, score | 8 (3-14) | 12 (6-19) | 17 (12-23) | <0.001 |
| Stroke etiology, n (%) |  |  |  | <0.001 |
| LAA | 54 (35.3) | 129 (42.3) | 62 (40.5) |  |
| CE | 37 (24.2) | 98 (32.1) | 63 (41.2) |  |
| SAA | 19 (12.4) | 10 (3.3) | 3 (2.0) |  |
| SOE | 31 (20.3) | 48 (15.7) | 17 (11.1) |  |
| SUE | 12 (7.8) | 20 (6.6) | 8 (5.2) |  |
| Dysphagia, n (%) | 61 (39.9) | 205 (67.2) | 135 (88.2) | <0.001 |
| Intravenous thrombolysis, n (%) | 15 (9.8) | 32 (10.5) | 28 (18.3) | 0.024 |
| endovascular treatment, n (%) | 32 (20.9) | 76 (24.9) | 64 (41.8) | <0.001 |
| Successful recanalization, n (%) | 28 (87.5) | 68 (89.5) | 60 (93.8) | 0.280 |
| Laboratory data |  |  |  |  |
| White blood cells, ×109/l | 6.4 (5.7-8.2) | 8.9 (7.4-10.9) | 11.9 (9.7-14.5) | <0.001 |
| Neutrophils, ×109/l | 4.1 (3.4-5.2) | 7.0 (5.6-8.8) | 10.2 (8.4-13.0) | <0.001 |
| Lymphocyte, ×109/l | 1.8 (1.4-2.2) | 1.3 (1.0-1.6) | 0.8 (0.6-1.2) | <0.001 |
| Platelet, ×109/l | 167 (134-202) | 188 (155-229) | 222 (184-272) | <0.001 |
| CRP, mg/l | 5.0 (2.2-11.8) | 8.3 (3.4-22.7) | 11.8 (3.8-32.6) | <0.001 |
| PCT, μg/l | 0.1 (0.0-0.1) | 0.1 (0.0-0.1) | 0.1 (0.0-0.2) | 0.013 |
| IL-6, ng/l | 16.8 (8.8-38.0) | 21.2 (9.8-63.3) | 25.1 (11.3-61.2) | 0.081 |
| Total cholesterol, mmol/l | 4.2 (3.5-5.0) | 4.2 (3.5-5.0) | 4.1 (3.5-4.8) | 0.512 |
| Triglyceride, mmol/l | 1.3 (0.9-1.8) | 1.2 (0.9-1.6) | 1.1 (0.8-1.4) | 0.001 |
| HbA1c, % | 5.8 (5.5-7.1) | 5.9 (5.5-7.1) | 5.9 (5.5-6.6) | 0.818 |
| Medication at discharge, n (%) |  |  |  |  |
| Antiplatelet drug | 132 (86.3) | 244 (80.0) | 105 (68.6) | <0.001 |
| Anticoagulant | 24 (15.7) | 48 (15.7) | 34 (22.2) | 0.131 |
| Statin | 145 (94.8) | 270 (88.5) | 118 (77.1) | <0.001 |
| PSI, score | 71 (61-88) | 78 (64-97) | 93 (79-114) | <0.001 |
| CURB-65, score | 1 (0-2) | 1 (1-2) | 2 (1-2) | <0.001 |
| Time of follow-up, years | 3.6 (2.0-5.1) | 3.0 (1.4-4.6) | 2.0 (0.5-3.6) | <0.001 |
| Mortality, n (%) | 21 (13.7) | 79 (25.9) | 64 (41.8) | <0.001 |

Abbreviations: BMI, body mass index; CE, cardio-embolism; CRP, C-reactive protein; CURB-65, Confusion, uremia, elevated respiratory rate, hypotension, and aged 65 years or older; HbA1c, Hemoglobin A1c; IL-6, interleukin-6; LAA, large-artery atherosclerosis; NIHSS, National Institute of Health Stroke Scale; PCT, procalcitonin; PSI, pneumonia severity index; SAA, small-vessel occlusion; SII, systemic immune-inflammation index; SOE, stroke of other determined etiology; SUE, stroke of undetermined etiology.

**Table S3.** **Univariable Analysis of the Risk Factors for Mortality.**

|  | **Univariate Cox regression** |  |
| --- | --- | --- |
| **Characteristic** | HR (95% CI) | ***P* value** |
| Age, years | 1.064 (1.046-1.082) | <0.001 |
| Male, n (%) | 0.784 (0.569-1.080) | 0.137 |
| BMI, kg/m2 | 0.972 (0.930-1.017) | 0.221 |
| Hypertension, n (%) | 1.322 (0.925-1.888) | 0.125 |
| Diabetes mellitus, n (%) | 1.102 (0.755-1.607) | 0.616 |
| Dyslipidemia, n (%) | 1.261 (0.848-1.874) | 0.252 |
| Atrial fibrillation, n (%) | 2.605 (1.898-3.577) | <0.001 |
| History of cancer, n (%)  Drinking status, n (%) | 2.445 (1.411-4.234) | 0.001 |
| Nondrinkers | Reference |  |
| Former drinkers | 0.760 (0.485-1.190) | 0.230 |
| Current drinkers | 0.792 (0.519-1.208) | 0.279 |
| Smoking status, n (%) |  |  |
| Nonsmokers | Reference |  |
| Former smokers | 1.124 (0.668-1.890) | 0.660 |
| Current smokers | 0.681 (0.490-0.946) | 0.022 |
| Baseline NIHSS score | 1.051 (1.036-1.066) | <0.001 |
| Stroke subtypes, n (%) |  |  |
| LAA | Reference |  |
| CE | 2.030 (1.438-2.867) | <0.001 |
| SAA | 1.025 (0.489-2.151) | 0.947 |
| SOE | 0.770 (0.452-1.309) | 0334 |
| SUE | 0.660 (0.264-1.651) | 0.375 |
| Dysphagia, n (%) | 2.717 (1.828-4.039) | <0.001 |
| Laboratory data |  |  |
| White blood cells, ×109/l | 1.023 (0.995-1.052) | 0.107 |
| Neutrophils, ×109/l | 1.037 (1.010-1.065) | 0.006 |
| Lymphocyte, ×109/l | 0.495 (0.374-0.655) | <0.001 |
| Platelet, ×109/l | 1.000 (0.998-1.002) | 0.967 |
| CRP, mg/l | 1.010 (1.006-1.014) | <0.001 |
| PCT, μg/l | 1.036 (0.998-1.075) | 0.061 |
| IL-6, ng/l | 1.000 (1.000-1.001) | 0.069 |
| Total cholesterol, mmol/l | 0.911 (0.800-1.038) | 0.160 |
| Triglyceride, mmol/l | 0.905 (0.738-1.109) | 0.335 |
| HbA1c, % | 1.087 (1.001-1.179) | 0.046 |
| Medication at discharge, n (%) |  |  |
| Antiplatelet | 0.500 (0.357-0.700) | <0.001 |
| Anticoagulant | 1.189 (0.804-1.759) | 0.385 |
| Statin | 0.411 (0.284-0.596) | <0.001 |
| PSI, score | 1.023 (1.019-1.027) | <0.001 |
| CURB-65, score | 2.079 (1.794-2.410) | <0.001 |
| SII, n (%) |  |  |
| Low | Reference |  |
| Median | 2.070 (1.279-3.350) | 0.003 |
| High | 4.130 (2.520-6.766) | <0.001 |

Abbreviations: BMI, body mass index; CE, cardio-embolism; CI, confidence interval; CRP, C-reactive protein; CURB-65, Confusion, uremia, elevated respiratory rate, hypotension, and aged 65 years or older; HR, hazard ratio; IL-6, interleukin-6; LAA, large-artery atherosclerosis; NIHSS, National Institute of Health Stroke Scale; PCT, procalcitonin; PSI, pneumonia severity index; SAA, small-vessel occlusion; SII, systemic immune-inflammation index; SOE, stroke of other determined etiology; SUE, stroke of undetermined etiology.

**Table S4. Direct and Indirect Associations of SII and Long-term Mortality via Pneumonia Severity**

|  | PSI | | CURB-65 | |
| --- | --- | --- | --- | --- |
| Association | β (95% CI) | *P* value | β (95% CI) | *P* value |
| Total | 0.28 (0.21-0.36) | <0.001 | 0.28 (0.20-0.38) | <0.001 |
| Direct | 0.19 (0.14-0.29) | <0.001 | 0.21 (0.12-0.28) | <0.001 |
| Indirect | 0.08 (0.05-0.12) | <0.001 | 0.08 (0.05-0.1) | <0.001 |
| Proportion mediated, % | 31 (16-43) | <0.001 | 26 (15-43) | <0.001 |

Abbreviations: CI, confidence interval; CURB-65, Confusion, uremia, elevated respiratory rate, hypotension, and aged 65 years or older; PSI, pneumonia severity index; SII, systemic immune-inflammation index.


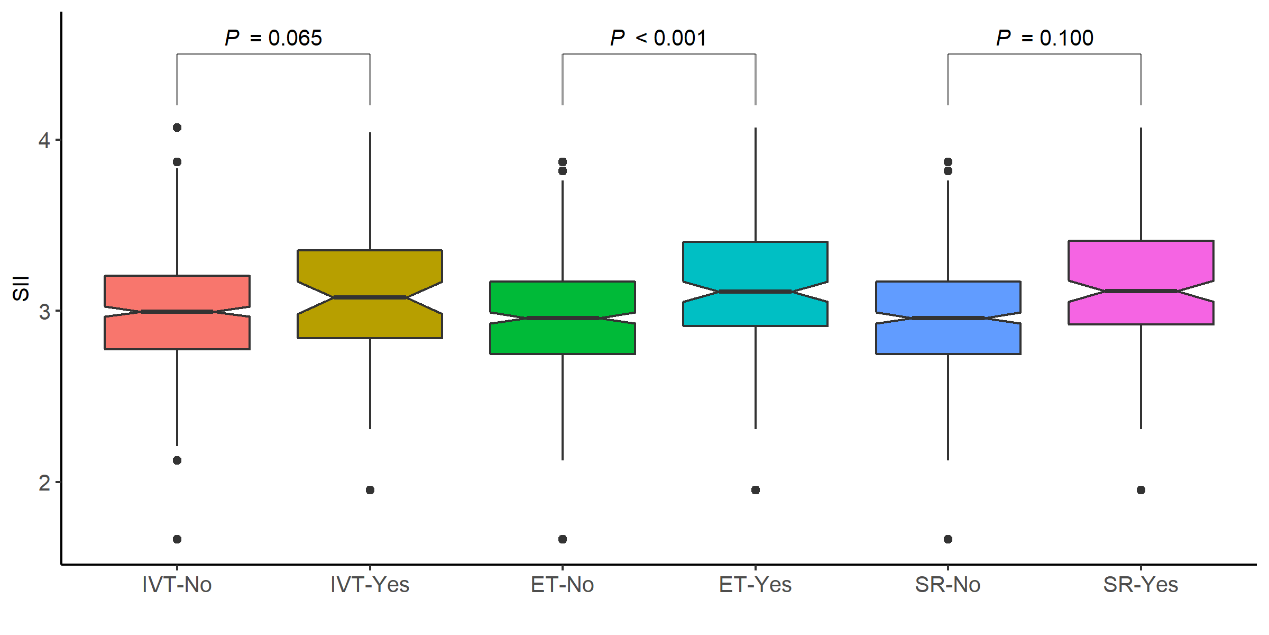


**Figure S1.** The Box Plot of Continuous SII Index in Different Treatment Groups

Abbreviation: ET, endovascular treatment; IVT, intravenous thrombolysis; SII, systemic immune-inflammation index; SR, successful recanalization.
